# Supplementary material for: Hydrological control of large hurricane-induced lahars: evidences from rainfall, seismic and video monitoring
Source: Copernicus journal article supplement (doi:10.5194/nhess-2017-354), 2017-10-13
Supplement: Supplementary file [file nhess-2017-354-SC2-supplement.pdf]

① No mention of catchment rainfall-runoff model in title.?

1 **Hydrological control of large hurricane-induced lahars: evidences from rainfall,**  
2 **seismic and video monitoring**

3 Capra L.<sup>1</sup>, Coviello V.<sup>1</sup>, Borselli L.<sup>2</sup>, Márquez-Hernández V.<sup>1</sup>, Arámbula-Mendoza R.<sup>3</sup>

4 <sup>1</sup> *Centro de Geociencias, Universidad Nacional Autónoma de México (UNAM), Campus*  
5 *Juriquilla, Queretaro, México*

6 <sup>2</sup> *Instituto de Geología, Universidad Autónoma de San Luis Potosí, San Luis Potosí,*  
7 *México*

8 <sup>3</sup> *Centro Universitario de Estudios e Investigaciones en Vulcanología (CUEIV),*  
9 *Universidad de Colima, Colima, México.*

10

11 **Abstract**

12 The Volcán de Colima, one of the most active volcanoes in Mexico, is commonly affected  
13 by tropical rains related to hurricanes that form over the Pacific Ocean. In 2001, 2013 and  
14 2016 hurricanes Jova, Manuel and Patricia, respectively, <sup>triggered</sup> promoted tropical storms that  
15 <sup>deposited</sup> accumulated up to 400 mm of rain in 36 hrs, with maximum intensities of 50 mm/hrs.

16 Effects were devastating, with lahars <sup>the</sup> activity along La Lumbre and Montegrande ravines,  
17 the most active channels on the S-SW flank of the volcano, lasting for several hours. Deep

18 erosion along the river channels and several <sup>marginal</sup> landslides at their side were observed, and  
19 ~~damages to bridges and paved roads~~ <sup>the</sup> ~~for~~ ~~caused~~ ~~damage~~ ~~to~~ ~~bridges~~ ~~&~~ ~~paved~~ ~~roads~~ resulted in the distal

20 <sup>reaches</sup> reach of the ravines. Based on data from real-time monitoring (including images, seismic  
21 records and rainfall data), the temporal sequence of these events is reconstructed and

22 analyzed with respect to the rainfall characteristics and the hydrological response of the  
23 watersheds based on rainfall/infiltration numerical simulation. For the studied events, lahars

24 occurred <sup>after the onset of</sup> after 5-6 hours since rainfall started, lasted several hours and were characterized

25 by several pulses with block-rich fronts and a maximum flow discharge of 900 m<sup>3</sup>/s.  
26 Rainfall/infiltration simulations were performed with the Flo-2D code using the SCS-Curve  
27 number infiltration model. Results show different behaviors for the arrival times of the first  
28 lahar pulses that correlate with the catchment's peak discharge for La Lumbre ravine and  
29 with the peaks in rainfall intensity for Montegrande ravine. This different behavior is  
30 strictly related to the area and shape of these two watersheds. Nevertheless, <sup>in all</sup> for all the  
31 analyzed cases, the largest lahar pulse always corresponds with the last one and correlates  
32 with the maximum peak discharge of these catchments. Data here presented show that <sup>flow</sup> main  
33 pulses within a lahar are not randomly distributed in time, and they can be correlated with  
34 rainfall peak intensity and/or watershed discharge, depending on the watershed area and  
35 shape. This outcome has important implications for hazard assessment during extreme  
36 hydro-meteorological events since it could help in real-time alert. A stormwater was here  
37 designed based on the rainfall time distribution of hurricanes Manuel and Patricia and, in  
38 case on available weather forecasts, it can be used to run simulations prior to the event, and  
39 have an estimation of the time <sup>to</sup> arrivals of main pulses, usually characterized by block-rich  
40 fronts <sup>which</sup> that are responsible of damage to infrastructures and loss of goods and lives.  
41

① obviously if discharge is the measure of lahar size...

② Cluspy

in order

42 **Keywords:** lahar, hurricane, rainfall/infiltration simulation, Volcán de Colima, Mexico.

### 44 1. Introduction

45 In past-recent years hurricanes have had catastrophic effects on volcanoes of the  
46 world <sup>the</sup> triggering <sup>of</sup> lahars (sediment-water gravity-driven flows on volcanoes). One of the  
47 most recent episode <sup>is</sup> is represented by the <sup>in 2009</sup> 2009 Hurricane Ida in El Salvador that caused

③ hurricane & cyclone belts are not global...

\* through through

\* in the <sup>2</sup> tropics

48 several landslides and debris flows from the Chichontepec volcano, killing 124 people, or  
49 by the 1998 Hurricane Mitch that triggered the collapse of a small portion of the inactive  
50 Casita volcano, originating a landslide that suddenly transformed into a lahar that  
51 devastated several towns and killed 2000 people (Van Wyk Vries et al., 2000; Scott et al.,  
52 2005). A similar event was observed in 2005 when tropical storm Stan triggered landslides  
53 and debris flows from the Toliman Volcano (Guatemala), causing more than 400 fatalities  
54 at Panabaj community (Sheridan et al., 2007). Other examples can be found at the  
55 volcanoes Pinatubo (Philippines), Merapi and Semeru (Indonesia), Soufrière (Montserrat),  
56 Mt. Ruapehu (New Zealand), where tropical storms and heavy rainfall seasons have  
57 triggered high-frequency lahar events (Umbal and Rodolfo, 1996; Cronin et al., 1997;  
58 Lavigne et al., 2000; Lavigne and Thouret, 2002; Barclay et al., 2007; Dumaisnil et al.,  
59 2010; Doyle et al., 2010, de Bélizal et al., 2013). + Tungurahua? (Jones et al. 2015)

60 Volcán de Colima (19°31'N, 103°37' W, 3860 m a.s.l., Fig. 1), one of the most  
61 active volcanoes in Mexico, is periodically exposed to intense seasonal rainfalls that are  
62 responsible for the occurrence of lahars from June to late October (Davila et al., 2007;  
63 Capra et al., 2010). Rain-triggered lahars represent a very common process during the rainy  
64 season (June-October) at Volcán de Colima (Davila et al., 2007; Capra et al., 2010;  
65 Vazquez et al., 2016a). They usually affect areas as much as 15 km from the summit of the  
66 volcano, with resulting damage to bridges and electric power towers (Capra et al., 2010),  
67 and are more frequent just after eruptive episodes such as dome collapse emplacing block-  
68 and-ash flow deposits (Davila et al., 2007; Vázquez et al., 2016b). Several hurricanes  
69 commonly hit the Pacific Coast each year and proceed inland as tropical rainstorm reaching  
70 the Volcán de Colima area. In particular, on 2011, 2013 and 2015 Jova, Manuel and

Hurricanes

*draining the edifice*

71 Patricia hurricane respectively triggered long-lasting lahars along main ravines, causing  
72 ~~several damages~~ <sup>severe</sup> on roads <sup>to</sup> and bridges, <sup>and leaving</sup> ~~leaving uncommunicated for few days~~ <sup>↑</sup> several  
73 communities in a radius of 15 km from the volcano, <sup>cut off for several days</sup>

74 Previous work (Davila et al., 2007; Capra et al., 2010) analyzed ~~the~~ lahars' frequency  
75 at Volcán de Colima in relation <sup>to</sup> ~~with the~~ eruptive activity and <sup>rainfall</sup> ~~the~~ characteristics of  
76 ~~rainfalls~~. Lahars are more frequent at the beginning of the rainy season, during short (< 1  
77 hour) stationary rainfalls, <sup>events</sup> with variable rainfall intensities and with only 10 mm of  
78 accumulated rainfall. This behavior has been attributed to a hydrophobic effect of soils on  
79 the volcano slope (Capra et al., 2010). In contrast, in the late rainy season, when tropical  
80 rainstorms are common, lahars are triggered depending on the 3-day antecedent rainfall and  
81 with intensities that increase as the total rainfall amount increases (Capra et al., 2010). The  
82 lahars' record used for these previous studies was <sup>↔</sup> only based on seismic data. Since 2011 a  
83 visual monitoring system <sup>has</sup> ~~have~~ been installed on <sup>the</sup> Montegrande and La Lumbre ravines  
84 (Figure 1), based on which a quantitative characterization of some events (i.e. type of flow,  
85 velocity, flow discharge, flow fluctuation) ~~have~~ been possible (i.e. Vázquez et al., 2016a;  
86 Coviello et al., under revision). The aim of the present paper is to better understand ~~the~~  
87 lahars' initiation processes and their dynamical behavior, especially during hurricane events,  
88 when more damages <sup>has</sup> ~~have~~ been observed on inhabited area. <sup>h</sup> In particular, the arrival time of <sup>the</sup>  
89 main lahar's front/surge at the monitoring stations is here analyzed with respect to ~~the~~  
90 rainfall characteristics (rain accumulation and intensity) <sup>and</sup> in relation <sup>to</sup> ~~with the~~ hydrological  
91 response ~~of the~~ <sup>a</sup> watersheds based on rainfall/infiltration numerical simulation. The  
92 occurrence of discrete surges within lahars <sup>has</sup> ~~have~~ been attributed to spatially and temporally  
93 distributed lahar sources, temporary damming, progressive entrainment of bed material or

94 change in slope angle (i.e. Iverson 1997; Marchi et al. 2002; Takahashi 2007; Zanuttigh and  
95 Lamberti 2007; Doyle et al., 2010; Kean et al., 2013). Without excluding previous models,  
96 data here presented shows that main pulses within a lahar are not randomly distributed in  
97 time, and they can be correlated with rainfall peak intensity and/or watershed discharge,  
98 depending on the watershed shape, and hydrophobic behavior subject to the antecedent soil  
99 moisture. The lahars triggered by the hurricanes Jova, Manuel and Patricia are here used as  
100 they <sup>represent</sup> correspond with the best documented events <sup>from the recent record</sup> occurred during past years, and they will  
101 be also compared with an extraordinary hydrometeorological event <sup>that</sup> occurred at the begin of  
102 the rain season (11 June, 2013) to better show the drastic change on lahar initiation due to  
103 the hydrophobic effect of soils at Volcán de Colima. Based on rainfall distribution over  
104 time for the analyzed events, a stormwater is here designed, which can be used to run  
105 simulations prior to an event to have an estimation of the time arrivals of main pulses when  
106 weather forecast is available. The data here presented have important implication for hazard  
107 assessment during extreme hydrometeorological events as a complementary tool <sup>to</sup> of an early  
108 warning system.

②  
Clarify

109

## 110 2. Methods and data

### 111 2.1. La Lumbre and Montegrande watersheds

112 The source area of lahars at Volcán de Colima corresponds to the uppermost unvegetated  
113 portion of the cone (Fig. 1 and 2a), with slopes between 35° and 20°, that also corresponds  
114 with an area of high connectivity, being prone to rills formation and erosive processes  
115 (Ortiz et al., 2017). The channels along main ravines have slopes from 15° up to 4° in the

that vary proximally  
a maximum of

116 more distal reach, <sup>es</sup> they are flanked by densely vegetated terraces, up to 15 m high <sup>on</sup>  
 117 average, that consist of debris avalanche and pyroclastic deposits from past eruptions (Figs.  
 118 2b and c) (Cortes et al., 2010; Roverato et al., 2011). Seven major watersheds ~~from 2 to 14~~  
 119 ~~km<sup>2</sup>~~ <sup>in area</sup> feed the main ravines draining from the volcano on the southern side (Fig. 1). La  
 120 Lumbre is the largest watershed, with a total area of 14 km<sup>2</sup>, and Montegrande is <sup>representative</sup> ~~in average~~  
 121 <sup>of</sup> with the other catchments, with an area of 2 km<sup>2</sup> (Fig. 1). Beside the difference in total  
 122 area, the Montegrande and La Lumbre watersheds are quite different in geometry.  
 123 Montegrande catchment is elongated, with a maximum width of 800 m, (300 m ~~in average~~)  
 124 In contrast, the proximal portion of the La Lumbre catchment includes all <sup>of</sup> the NW slope of  
 125 the cone, <sup>before elongating</sup> ~~to then extent to a more elongated shape~~ towards SW, being up to 1500 m in  
 126 width. These differences in area and shape can be correlated with a different <sup>water discharge</sup> response ~~in~~  
 127 <sup>during</sup> ~~water discharge~~ under a rainfall event. In circular drainages, <sup>i.e.</sup> as the proximal portion of the  
 128 La Lumbre watershed, all points are quite equidistant from the main river so all the  
 129 precipitation reaches the river at the same time, concentrating a large volume of water. In  
 130 contrast, in a more elongate basin, lateral drainages quickly drain water <sup>into</sup> ~~on~~ the main  
 131 channel at different points but with a lower total discharge. The Gravelius's index Kg  
 132 (Bendjoudi and Hubert 2002), which is defined as the relation between the perimeter of the  
 133 watershed (P) and that of a circle having a surface equal to that of a watershed (A):

$$Kg = \frac{P}{2\sqrt{\pi A}}$$

134 is here estimated for Montegrande watershed and for the upper, circular portion of La  
 135 Lumbre watershed, obtaining values of 1.7 and 1.1 respectively. The lower the value, the  
 136 more regular the basin's perimeter and the more prone it is to present high runoff peaks.

137 Based on these considerations, at La Lumbre watershed a larger volume of water  
138 concentrates along the main channel because of its larger surface and circular shape, but  
139 after a larger period of time <sup>relative to</sup> respect to Montegrando ravine, where a <sup>smaller</sup> minor volume of water  
140 quickly reaches the main drainage.

141

## 142 2.2 Lahar Monitoring at Volcán de Colima

143 In 2007, a monitoring program was implemented at Volcán de Colima. <sup>Initially</sup> At ~~the~~ beginning,  
144 two rain gauges ~~where~~ installed to study lahar initiation (AR and PH sites, Figure 1) and  
145 lahar propagation was detected by the broadband seismic stations of RESCO, the  
146 seismological network of Colima University (Davila et al., 2007; Zobin et al., 2009; Capra  
147 et al., 2010). Afterwards, <sup>T</sup> two monitoring station specifically designed for studying lahar  
148 activity were <sup>later</sup> installed, in 2011 at the Montegrando ravine and in 2014 at La Lumbre ravine  
149 (MSMg and MSL respectively, Figure 1). Both stations consist of a 12 m-high tower with a  
150 directional antenna transmitting data in real time to RESCO facilities, a camcorder  
151 recording images each 2-4 secs with a 704 x 480 pixels <sup>inch</sup> in resolution, a rain gauge coupled  
152 with a soil moisture sensor, and a 10 Hz geophone (Vázquez et al., 2016a; Coviello et al.,  
153 under revision). The rain gauge (HOBO RG3) records rain accumulation at one-minute  
154 intervals. At Montegrando ravine seismic data are also obtained from a 3 component Guralp  
155 CMG-6TD broadband seismometer installed ~~at~~ 500 m upstream from the monitoring site,  
156 sampling at 100 Hz (BB-RESCO, Figure 1).

157 <sup>The</sup> Montegrando station detected lahars <sup>the</sup> occurred during 2011 Jova and 2013 Manuel events,  
158 <sup>while</sup> and lahars triggered during ~~the~~ 2015 Hurrican Patricia <sup>in 2015</sup> were only recorded by La Lumbre

159 station (Table 1). In fact, in 2011, only MgMS site was <sup>the</sup> <sup>operational</sup> operating (as the BB-RESCO  
160 station), and recorded the seismic signal of the lahar <sup>with</sup> associated to Jova and Manuel. No  
161 images are available since both events occurred during the night. The LMS station <sup>began</sup> starts to  
162 operate at the end of 2013 and was able to record <sup>with</sup> the lahars associated to Hurricane Patricia  
163 along the La Lumbre ravine (images and geophone data). In contrast, in 2015 the MgMS <sup>site</sup>  
164 was destroyed by pyroclastic flows during the <sup>July 2015</sup> 10-11 explosive activity, and in October <sup>⊕</sup>  
165 2015 the new station was still under construction. Only few pictures were acquired and they  
166 are of low quality because of the abundant steam coming <sup>a</sup> <sup>generated by</sup> from the hot lahars since they  
167 originated from the remobilization of fresh pyroclastic flow deposits (Capra et al., 2016). ✓  
168 The 11 June 2013 event was perfectly captured by the camera installed at the MgMS site <sup>part of</sup>  
169 and the BB-RESCO recorded its seismic signal. <sup>sequence</sup>

170 The seismic signal is here analyzed to detect the arrival of main flow fronts and discharge  
171 variation. For this, only the amplitude of the signal is considered, which can be correlated  
172 with the variation in the maximum peak flow discharge (Doyle et al., 2010; Vázquez et al.,  
173 2016a). The seismic record is here compared with the available images to identify the main  
174 changes in dynamic <sup>-s</sup> of the detected lahars. All the lahars here analyzed correspond to multi-  
175 pulses events as classified by Vazquez et al. (2016a); they consist of long lasting lahars  
176 presenting several pulses, each one characterized by a block-rich front followed by the main  
177 body and dilute tail showing continuous changes in flow discharges. A detailed seismic  
178 description of these types of lahars is available in Vázquez et al. (2016a), here we focus on  
179 the number of main flow peaks and their arrival times (Table 2). <sup>h:</sup>

180



181 **2.3. The hydrometeorological events**

182 Hurricane Jova formed over the Pacific Ocean, hit the Pacific coast on October 12, 2011, as  
183 a category 2, and traveled inland toward Volcán de Colima. The hurricane arrived as a  
184 tropical storm at the town of Coquimatlán, just 10 km SW of the city of Colima with winds <sup>of</sup>  
185 up to 140 km/h, and 240 mm of rain over 24 h (Fig. 3a). Severe damage was registered in  
186 inhabited area, including the city of Colima where floods damaged roads, bridges and  
187 buildings.

188 ~~The 2013 Hurricane Manuel of (category 1), hit the~~ <sup>on X month 2013</sup> ~~pacific coast during national holidays~~  
189 ~~(Fiestas Patria) causing several damage to mountainous region in Guerrero state, triggering~~  
190 several landslides that caused up to 96 deaths and left several villages <sup>cut off</sup> uncommunicated as <sup>while</sup>  
191 thousands of tourists trapped at Acapulco and Ixtapa international airports. At Volcán the <sup>de</sup>  
192 Colima rains started on September 15 and lasted for more than 30 hrs with more than 300  
193 mm of accumulated rains (Fig. 3a).

194 ~~The 2015 Hurricane Patricia was considered as the strongest hurricane on record to affect~~  
195 Mexico. The system starts <sup>began</sup> to develop on 18 October over the Pacific Ocean, strengthened  
196 into a hurricane shortly after 00:00 GMT <sup>on</sup> 22 October and early on 23 October it reached its  
197 maximum category of 5. <sup>before</sup> ~~But late on the same day, the system rapidly lost its strength. It~~  
198 <sup>occurred</sup> ~~landfalls~~ <sup>late ?</sup> around 23:00 GMT along the coast of the Mexican state of Jalisco near Playa  
199 Cuixmala, about 60 km west-northwest of Manzanillo. ~~On the morning of the 23 October,~~  
200 ~~2015 it continued to rapidly weaken as it moves on the Sierra Madre Occidental high~~  
201 ~~relieves.~~ <sup>fell</sup> At Colima town, up to 400 mm of rains accumulated along 30 hours since the  
202 morning of 23 October (Fig. 3a). Lahars along the Montegrande ravine were hot since they

Exact date  
(6)

same day??

More text  
(6A)

203 originated from the erosion of pyroclastic flow deposits emplaced during the 10-11 July  
204 2015 eruption. Sever<sup>e</sup> damages affected the Colima town and the volcano surrounding. A  
205 bridge along the interstate was destroyed leaving <sup>cutting off</sup> uncommunicated La Becerrara village and  
206 interrupting the traffic between Colima and Jalisco states.

*Rainfall during hurricanes*  
207 Patricia and Manuel rainfalls show a similar behavior, with a progressive rain accumulation  
208 <sup>over</sup> along 28-30 hrs; in contrast, during Hurricane Jova, 200 mm of rain <sup>fell</sup> accumulated in less  
209 than 15 hrs, <sup>with only another 40 mm falling</sup> reaching a total of 240 mm during the following 13 hrs (Fig. 3a). These  
210 differences are more evident plotting the 10-min accumulated value normalized over the  
211 total accumulated rainfall (Fig. 3b). Average rainfall intensities calculated over a 10-min  
212 interval range from 32 mm/hr<sup>s</sup> to 37 mm/hr<sup>s</sup> for Manuel and Patricia events respectively  
213 and up to 43 mm/hr<sup>s</sup> for the Hurricane Jova (Table 2). Finally rainfall values were  
214 calculated at selected intervals (15 m, 30 m, 45 m, 1, 3, 6, 12, 18, 24, 28 hr) to design  
215 possible storm rainfall distributions based on tropical rains associated to hurricanes  
216 recorded <sup>historically at</sup> so far at Colima Volcano (Table 2). Considering the similar behavior of the  
217 Manuel and Patricia rainfalls, a stormwater can be designed considering their average  
218 values (Fig. 3c) (i.e. NRCS, 2008), based on which a forecast analysis can be performed, as  
219 will be discussed below.

*0.25, 0.5, 0.75,*

*27 on Table 2*

*2*

220

## 221 2.4. Rainfall simulations

222 To better understand the lahar behavior and duration during extreme hydrometeorological  
223 event<sup>s</sup> at Volcán de Colima, rainfall simulations were performed with Flo-2D code (O'Brian  
224 et al., 1993). The Flo-2D code routes the overland flow as discretized shallow sheet flow

225 using the Green-Ampt or the SCS Curve number (or combined) infiltration models. For the  
226 present work the SCS Curve Number (SCS-CN, i.e. Mishra and Singh, 2003) was selected.  
227 With this model, the volume of water runoff produced for the simulated precipitation is  
228 estimated through a single parameter that summarizes the influence of both the superficial  
229 aspects and deep soil, including the saturated hydraulic conductivity, type of land use, and  
230 humidity before the precipitation event. A similar approach was <sup>previously</sup> already used for modeling  
231 debris flow initiation mechanisms (i.e. Gentile et al., 2006; Llanes et al., 2015). To apply  
232 the SCS-CN model, it is necessary to classify the soil in one of four groups, each  
233 identifying a different potential runoff generation (A, B, C, D; USDA-NRCS 2007). The  
234 watershed of La Lumbre and Montegrande ravines were subdivided <sup>into</sup> in two main zone: the  
235 unvegetated upper cone, and the main channel that consist of unconsolidated pyroclastic  
236 material with large boulders imbedded in sandy to silty matrix, and the vegetated lateral  
237 terraces. Lateral terraces consist of old pyroclastic sequences, with incipient soils and  
238 <sup>are</sup> vegetated with pine trees and sparse <sup>bushes</sup> brushes, with soils that show a hydrophobic behavior  
239 at the beginning of the rain season (Capra et al., 2010). In-situ infiltration tests were also  
240 performed based on <sup>gave</sup> which values of saturated conductivity were obtained in the range of 50  
241 mm/h (nude soil) to 100 mm/h (vegetated) (Ortiz, 2017). Based on these observations, soils  
242 were classified between group A and B (Bartolini and Borselli, 2009). Curve Numbers for  
243 the vegetated terraces and for the nude soils were estimated <sup>at</sup> in 75 and 80 respectively (in  
244 wet season, Hawkins et al., 1985; Ferrer-Julia et al. 2003). To perform <sup>a</sup> simulation with the  
245 FLO-2D code, two polygons were traced to delimit the un-vegetated portion of the cone  
246 from the vegetated area of the watershed, and at each polygon the relative CN value was  
247 assigned. The simulated rain corresponds with the cumulative value calculated at 10  
248 minutes interval (Fig. 3b). At the apex of each watershed a barrier of outflow points were

(7)  
looks like  
3 zones  
unless  
combine  
channel &  
terrace

249 defined to obtain the total values of the watershed discharge. The simulation was performed  
250 with a 20-m digital elevation model. ✓

251  
252 *at around 07:20 GMT (all times hereafter reported as GMT) on 12 October 2011*

### 252 3. Results

253 During the Jova hurricane, lahars started in Montegrande ravine early in the morning of 12  
254 ~~October, 2011, around 07:20 GMT (here after all time is in GMT), after approximately 40~~  
255 *had fallen* % of the total rain (240 mm) accumulated (Fig. 4a). The event lasted more than 4 hours,  
256 and three main peaks in amplitude can be detected in the seismic signal (Fig. 4a). In  
257 particular, the first two peaks are similar in amplitude (0.015 cm/s), separated by more than  
258 2 hours of signal fluctuation. *end* After less than one hour *after* from the second peak, a single,  
259 discrete pulse can be recognized (0.05 cm/s in amplitude), followed by a “train” of low-  
260 amplitude seismic peaks that lasted for more than an hour. ✓

261 Along the same ravine, an extreme event was recorded on 11 June, 2013. This event  
262 corresponds to an extraordinary episode and is here introduced to better discuss the  
263 hydrological response of the Montegrande ravine. It represents an unusual event at the  
264 beginning of the rainy season, *with* *of rain falling* considering the total accumulated rainfall of 120 mm in less  
265 than 3 hrs (Table 2), with maximum *a* *peak* *of* *pick* intensity up to 140 mm/hr (Fig. 4b). Based on the  
266 seismic record and the still images of the event, this lahar was previously characterized as a  
267 multi-pulse flow, with three main blocks-rich fronts (I, II and IV, Fig. 4c), with similar  
268 amplitudes (0.015-0.025 cm/s), followed by a main flow body consisting of a homogenous  
269 mixture of water and sediments (with a sediment concentration at the transition between a  
270 debris flow and an hyperconcentrated flow) (III, Fig. 4c) (Vazquez et al. 2016a). The last,

271 more energetic pulse (0.042 cm/s) was accompanied by a water-rich frontal surge that was  
272 able to reach the lens of the camera (IV, Fig. 4c). Comparing the Jova and the 2013 event  
273 seismic records it is possible to note that in both events, the largest pulse corresponds with  
274 the last one. Flow discharge was estimated for the 2013 event, with a maximum of 120 m<sup>3</sup>/s  
275 value for the largest pulse (IV, Figure 4b) (Vazquez et al., 2016a). For the Jova event, the  
276 only visual data available are the images of the channel the day before and the day after the  
277 event, where a deep erosion of the channel is visible (Fig. 5), but comparing its seismic  
278 signal with the 2013 lahar, and based on the classification criterion established for lahars at  
279 Volcán de Colima (Vazquez et al., 2016a) each main peak corresponds to the arrival of a  
280 flow surges or to block-rich fronts followed by the body of the flow. (Fluctuation in seismic  
281 energy along the vertical component reflects variation in flow discharge.)

282 The lahar recorded during the Hurricane Manuel along the Montegrande ravine shows a  
283 similar behavior as described for the Jova event (Fig. 6). As the event occurred during the  
284 night no images are available. Based on the seismic record from the BB-RESCO, lahars  
285 stated around 03:00, and lasted for seven hours. The event was characterized by five main  
286 pulses, whose amplitude increases with time (0.012-0.025 cm/s), being the last one the  
287 largest in magnitude (0.04 cm/s). Based on the amplitude values, the first two peaks  
288 correspond to precursory dilute flow waves followed by the three main pulses with block-  
289 rich fronts (I, II and III, Fig 6).

290 For the Hurricane Patricia, seismic data (from the geophone) and still images were recorded  
291 at the La Lumbre monitoring station. Based on these data, at approximately 21:22 a slurry  
292 flow was detected on the main channel (Fig. 7a). First pulses of hyperconcentrated flows were  
293 detected around 01:30 (24 October), which progressively increased in flow discharge and

294 sediment concentration. Several front waves were observed during flooding (I and II, Fig.  
295 7b) for which an average flow discharge of 80-100 m<sup>3</sup>/sec was estimated, and two main  
296 pulses arrived at 04:30 and 05:00, with 6 m-depth block-rich fronts and maximum flow  
297 discharge of 900 m<sup>3</sup>/sec (III, IV, V and VI, Fig. 7b). At around 05:40 the seismic record  
298 detected the arrival of a third pulse. Although no images were available, the amplitude of  
299 the last pulse (0.07 cm/s) suggests it was larger than those previously described. As  
300 observed for the three <sup>previous</sup> events recorded at Montegrande ravine, the largest pulse <sup>again</sup> corresponded  
301 again with the last one.

302 The results of rainfall simulations are plotted as a normalized curve of the total discharge,  
303 along with the normalized accumulated rainfall and its intensity (calculated over a 10-min  
304 interval) (Fig. 8). In the same plot, the arrival time of the main lahar pulses here analyzed is  
305 also indicated (red triangles, Fig. 8). By comparing <sup>simulated</sup> watershed discharge with rainfall  
306 intensity, a general correlation can be observed for the Montegrande basin during Jova and <sup>hurricanes</sup>  
307 Manuel <sup>(Fig 8A & B)</sup> hurricane, <sup>(Fig 8C)</sup> contrasting with the June 2013 event, where the simulation is not able to  
308 reproduce watershed discharge during the first minutes of the event when most of rainfall is  
309 accumulated and maximum rainfall intensities are detected. For la Lumbre watershed a  
310 clear correlation between <sup>rainfall</sup> peak intensities and <sup>simulated</sup> watershed discharge is not clearly <sup>(Fig 8D)</sup>

311 observable. If the arrival times of the main lahars pulses are considered, the events  
312 associated to the hurricanes Jova and Manuel along the Montegrande ravine show a similar  
313 behavior. In both cases, early slurry flows are detected after ~40% of the total rain is  
314 accumulated. The main flow pulses better correlate with the highest rain intensity values,  
315 which also correspond with maximum peaks in <sup>simulated</sup> watershed discharge; the last, largest pulse  
316 corresponds with the maximum <sup>simulated</sup> peak discharge of the watershed. In contrast, for the

in 2015  
New paragraph?  
8  
more than 1 sentence down!  
IP New paragraph

For the  
317 Patricia event, along the La Lumbre ravine, first slurry flows also starts after 40% or  
318 rainfall accumulated, but main lahar pulses fit better with the peaks watershed discharge.  
319 Finally, analyzing the simulation in the Montegrando ravine for the June 2013 event, it is  
320 possible to observe a different behavior. The lahar starts as less than the 10% of rain is  
321 accumulated, and the main lahar pulses perfectly correlate with the peak rainfall intensities,  
322 and only the last largest pulse correlates with the watershed peak discharge.

323 Move to  $\leftarrow$  on line 309 316 (9)

324 **4. Discussion**

325 At present, <sup>Various</sup> ~~several~~ attempts to define lahar rainfall thresholds <sup>have been made</sup> ~~have been already~~ carried out  
326 <sup>at</sup> for different volcanoes (i.e. Lavigne et al., 2000; van Westen and Daag, 2005 Barclay et al.,  
327 2007), including Volcán de Colima (Capra et al., 2010). This study is <sup>focused on</sup> ~~mostly addressed to~~  
328 better predict <sup>ions of</sup> the lahar evolution during extraordinary hydrometeorological event <sup>such</sup> as  
329 hurricanes, a common long-duration and large-scale rainfall phenomenon <sup>in</sup> at tropical  
330 latitudes. In particular, we are interested in predicting the arrival of block-rich fronts that <sup>is not extra-ordinary?</sup>  
331 have caused <sup>severe</sup> ~~several~~ damages during past events. Based on the seismic and visual data  
332 gathered from the events here <sup>analyze</sup> analyzed, it is possible to <sup>identify</sup> evidence which are the key factors  
333 in controlling the arrival of main lahars fronts. For Jova, Manuel and Patricia events, lahars  
334 started after the 40% of total rain accumulated, and apparently the timing for the initial  
335 pulses correlate well with the peaks of the rainfall intensity for the Montegrando ravine, <sup>(11)</sup>  
336 while for La Lumbre ravine they better match with the <sup>peak simulated</sup> watershed discharge. Nevertheless <sup>(12)</sup>  
337 for all analyzed cases, the largest pulses correspond with the last ones and correlate with the  
338 <sup>simulated</sup> peak watershed discharge for all the analyzed examples. The observed difference between

(10) \* hard to predict when the 40% point is reached when it is still raining...  
(11) + no lag time??  
(12) Is it possible to run Flo-2D in real-time  
15

339 Montegrande and La Lumbre ravines can be correlated with the different areas and shapes  
340 of the two catchments. In fact, due to its elongated shape ( $K_G = 1.7$ ) and small area ( $A \approx 2$   
341  $\text{km}^2$ ), the Montegrande watershed shows a quicker response between rainfall and discharge,  
342 with a rapid water runoff that concentrated at different point along the main channel (Fig.  
343 1b). This behavior is much clearer for the June 2013 event, which occurred at the beginning  
344 of the <sup>wet</sup> rain season when soils on the lateral terraces of the ravines show a hydrophobic  
345 behavior (Capra et al., 2010). The simulation <sup>was</sup> is not able to reproduce any watershed  
346 discharge at the beginning of the event, because the hydrophobic behavior of the soils  
347 inhibits the infiltration and the water runoff quickly promotes lahar initiation. During this  
348 event, the first lahar pulses perfectly match with the rainfall peak intensities (except for the  
349 last major pulse), starting from the very beginning of the rainfall event. In contrast, La  
350 Lumbre ravine has a wider, rounded upper watershed ( $K_G = 1.1$ ;  $A = 14 \text{ km}^2$ ) that is able to  
351 concentrated a larger volume of water before to <sup>entering</sup> turn SW in the main channel where lateral  
352 contribution can <sup>still</sup> increase water discharge. Even if <sup>further</sup> rainfalls <sup>during</sup> of hurricanes Manuel and  
353 Patricia show <sup>ed</sup> a similar behavior (Fig. 3), the catchment response of La Lumbre is clearly  
354 different with a pulsating behavior of lahars mainly controlled by the <sup>(simulated)</sup> watershed discharge.  
355 Nevertheless, for all the events here analyzed, the largest pulse corresponds with the last  
356 one recorded and it <sup>simulated</sup> correlates with the maximum watershed discharge, pointing to a strong  
357 control of the catchments recharge in generating the largest and more destructive pulses.  
358 Previous works correlated the occurrence of surges within a lahar to multiple sources, such  
359 as lateral tributaries along the main channel (i.e. Doyle et al., 2010) or due to the failure of  
360 temporary dams of large clasts in <sup>triggered</sup> <sup>by</sup> <sup>the</sup> correspondence of an increase in rainfall intensity (Kean  
361 et al., 2013). Lateral tributaries are absent in both Montegrande and La Lumbre channels  
362 and, even if <sup>an</sup> accumulation of clasts <sup>were</sup> it is possible, no significant discontinuities of the

(14) so simulation cannot duplicate initial hydrophobic behavior.

(15) No calibration of simulated discharge?



363 channel bed can be observed upstream <sup>of</sup> the monitoring sites. Based on data here presented,  
364 formation of pulses within a lahar is mostly controlled <sup>by</sup> with the increase in water runoff that  
365 at a critical discharge rate mobilized a large volume of sediment where large clasts  
366 accumulate at its front. This is a well-documented mechanism (i.e. Iverson, 1997), but  
367 based on the model here proposed, the discharge rate is controlled by the watershed  
368 discharge that regulates the timing <sup>of</sup> on the arrival of main pulses, depending on the rainfall  
369 behavior and the watershed shape. Nevertheless, the last pulse <sup>always</sup> is the largest in  
370 volume. <sup>New paragraph</sup> This model is strictly related to migratory, long-duration and large-scale rainfall  
371 events hitting tropical volcanoes such as the Volcán de Colima. In fact, during mesoscale  
372 non-stationary rainfalls, typical at the beginning of the rainy season, lahars are usually  
373 triggered at low accumulated rainfall values and controlled by rainfall intensity due to the  
374 hydrophobic behavior of soils, and they usually consist of <sup>single</sup> uni-pulse events with <sup>one</sup> a single  
375 block-rich front that last less than one hour (i.e. Vázquez et al., 2016b). In perspective, the  
376 results here presented can be used to design an Early Warning System (EWS) for hurricane-  
377 induced lahars, i.e. event triggered by long-duration and large-scale rainfalls. Most  
378 common pre-event or advance-EWSs for debris flows are based on empirical correlations  
379 between rainfall and debris flow occurrence (e.g., Keefer et al., 1987; Aleotti, 2004; Baum  
380 and Godt, 2009). The instruments adopted for debris-flow advance warning are those  
381 normally used for hydrometeorological monitoring and consist of telemetry networks of  
382 rain gauges and/or weather radar. The typical way to represent these relations is identifying  
383 critical rainfall thresholds for debris flow occurrence. The availability of both a large  
384 catalogue of events and a reliable precipitation forecast that could give the predicted  
385 amount of rainfall some hours in advance would allow the issue of an effective warning, at  
386 least in predicting the <sup>likely</sup> arrival time of the main lahar pulses. In addition, instrumental

387 monitoring of in-channel processes can be used to validate a preliminary warning-condition  
388 triggered by ~~weather~~ forecast and/or rainfall measurements.

*weather*

389

## 390 **5. Conclusions**

391 Real time monitoring of lahars at Volcán de Colima ~~volcanoes~~ *demonstrate* reveal that watershed  
392 discharge is the key factor in controlling the arrival of main block-rich fronts during long-  
393 lasting lahar triggered during tropical storms, and that the largest destructive pulses will  
394 arrive after the initial surging. For the 2015 Hurricane Patricia event the weather forecast  
395 predicted an estimated value for the total rainfall, ~~as~~ *and* also the approximate time of its  
396 landfall. Based on the ~~deigned~~ *design* storm obtained with the time rainfall *time* distribution of the  
397 event here *would* analyzed, it could have been possible to anticipate when lahars started along the  
398 La Lumbre ravine, and the arrival time of main pulses. Along the other ravines, that show a  
399 watershed similar to the Montegrande, it ~~could~~ *would* have been possible to predict the arrival of  
400 at least the largest pulse. This information coupled with ~~the~~ real time monitoring could be a  
401 better tool for hazard assessment and risk mitigation. In fact, these findings can be used to  
402 implement an advance warning system based on the monitoring of a hydrometeorological  
403 process to issue a warning before a possible lahar is triggered.

404

## 405 **Acknowledgements.**

406 This work was supported by CONACyT projects 230 and 220786 granted to Lucia Capra  
407 and by the postdoctoral fellowship of DGAPA (Programa de Becas Posdoctorales de la

408 UNAM) granted to Velio Coviello. Thanks to José Luis Ortiz and Sergio Rodríguez, from  
409 the Centro de Prevención de Desastres (CENAPRED), who set up the instrumentation on  
410 the Montegrande monitoring site.

411

## 412 **References**

413 ✓ Aleotti P (2004) A warning system for rainfall-induced shallow failures. Eng. Geol. 73(3-  
414 4): 247–265.

415 ✓ Barclay J, Alexander J, Susnik L (2007) Rainfall-induced lahars in the Belham valley,  
416 Monserrat, West Indies. Journal of the Geological Society of London 164: 815-827.

417 ✓ Bartolini D, Borselli L (2009) Evaluation of the Hydrologic Soil Group (HSG) with the  
418 Procedure SCS Curve Number. In: Manual of Methods for Soil and Land Evaluation,

419 *Not cited in paper* Edoardo A, Costantini C (ed), Science Publisher Inc., 600 pages. ISBN 978-1-57808-571-2

420 ✓ Baum R L, Godt JW (2009) Early warning of rainfall-induced shallow landslides and debris  
421 flows in the USA. Landslides 7(3): 259–272.

422 ✓ Bendjoudi H, Hubert P (2002) Le coefficient de Gravélius : analyse critique d'un indice de  
423 forme des bassins versants. J. Sci. Hydrol. 47: 921–930.

424 ✓ Capra L, Borselli L, Varley N, Norini G, Gavilanes-Ruiz JC Sarocchi D, Caballero L  
425 (2010) Rainfall-triggered lahars at Volcán de Colima, Mexico: surface hydro-repellency as  
426 initiation process. Journal of Volcanology and Geothermal Research 189(1-2): 105-117.

- 427 Cortes A, Macias JL, Capra L, Garduño-Monroy VH (2010) Sector collapse of the SW  
428 flank of Volcán de Colima, México. The 3600 yr BP La Lumbre-Los Ganchos debris  
429 avalanche and associated debris flows. *Journal of Volcanology and Geothermal Research*  
430 197: 52-66.
- 431 Coviello V, Capra L, Vázquez R, Marquez-Hernández V, under revision. Seismic  
432 characterization of hyperconcentrated flows in volcanic environment. *Earth Surface*  
433 *Processes and Landforms*.
- 434 Cronin SJ, Hodgson KA, Neall VE, Palmer AS, Lecointre JA (1997) 1995 Ruapehu lahars  
435 in relation to the late Holocene lahars of Whangaehu River, New Zealand. *New Zealand*  
436 *Journal of Geology and Geophysics* 40: 507-520.
- 437 Davila N, Capra L, Gavilanes JC, Varley N, Norini G (2007) Recent lahars at Volcán de  
438 Colima (Mexico): drainage variation and spectral classification. *Journal of Volcanology*  
439 *and Geothermal Research* 165: 127-141.
- 440 de Bélizal E, Lavigne F, Hadmoko DS, Degai JP, Dipayana GA, Mutagin BW, Marfai MA,  
441 Coquet M, Le Mauff B, Robin AK, Vidal C, Cholik N, Aisyah N (2013) Rain-triggered  
442 lahars following the 2010 eruption of Merapi volcano, Indonesia: A major risk. *Journal of*  
443 *Volcanology and Geothermal Research* 261: 330-347.
- 444 Doyle EE, Cronin SJ, Cole SE, Thouret JC (2010) The coalescence and organization of  
445 lahars at Semeru volcano, Indonesia. *Bulletin of Volcanology* 72(8): 961-970.

- 446 ✓ Dumaisnil C, Thouret JC, Chambon G, Doyle EE, Cronin SJ (2010) Hydraulic, physical  
447 and rheological characteristics of rain-triggered lahars at Semeru volcano, Indonesia. *Earth  
448 and Surface Processes and Landform* 35: 1573-1590.
- 449 Ferrer-Julio M, Estrela T, Sanchez del Corral Jimenez A, Garcia-Melendez E (2003)  
450 ✓ Generation of a curve number map with continuous values based on saturated hydraulic  
451 conductivity. XI World Water Congress, 5-9 October 2003, Madrid, Spain: 1-10.  
452 <http://iwra.org/member/index.php?mainpage=&page=286&congressyear=2003>
- 453 ✓ Gentile F, Bisantino T, Puglisi S, Trisorio Liuzzi G (2006) Analysis and modeling of debris  
454 flows in Gargano watersheds (Puglia region, Southern Italy). *WIT Transactions on Ecology  
455 and the Environment* 90: 181-191.
- 456 ✓ Hawkins RH, Hjelmfelt AT, Zevenbergen AW (1985) Runoff probability storm depth and  
457 curve numbers. *Journal of the Irrigation and Drainage Division* 111: 330-340.
- 458 Kean W, McCoy S, Tucker G, Staley D, Coe J (2013) Runoff-generated debris flows:  
459 ✓ Observations and modeling of surge initiation, magnitude, and frequency. *Journal of  
460 Geophysical Research: Earth Surface* 118: 1-18.
- 461 ✓ Keefer DK, Wilson RC, Mark RK, Brabb EE, Brown WM, Ellen SD, Harp EL, Wiczorek,  
462 GF, Alger CS, Zatkan RS (1987) Real-time landslide warning during heavy rainfall.  
463 *Science* 238(4829): 921-5.
- 464 ✓ Iverson RM (1997) The physics of debris flows: *Reviews of Geophysics* 35: 245-296.
- 465 ✓ Lavigne F, Thouret JC, Voight B, Suwa H, Sumaryono A (2000) Lahars at Merapi volcano,  
466 Central Java: an overview. *Journal of Volcanology and Geothermal Research* 100: 423-456.

467 ✓ Lavigne F, Thouret JC (2002) Sediment transport and deposition by rain-triggered lahars at  
468 Merapi Volcano, Central Java, Indonesia. *Geomorphology* 49: 45-69.

469 Llanes F, Ferrer PK, Gacusan R, Realino V, Obrique J, Eco RN, Lagmay AMF (2015)  
470 ✓ Scenario-based maps using flo-2d and IFSAR-derived digital elevation models on the  
471 November 2006 rainfall-induced lahars, Mayon Volcano, Philippines. *ACRS 2015*  
472 *Proceedings, Asian Association on Remote Sensing.*

473 ✓ Marchi L, Arattano M, Deganutti A. (2002) Ten years of debris-flow monitoring in the  
474 Moscardaro Torrent (Italian Alps), *Geomorphology* 46: 1–17, doi:10.1016/S0169-  
475 555X(01)00162-3.

476 ✓ Mishra S K, Singh VP (2003) Soil conservation service curve number (SCS-CN)  
477 methodology. Kluwer Academic Publishers, Dordrecht, Netherlands.

478 ✓ Natural Resource Conservation Services (2008) Rainfall-Frequency and Design Rainfall  
479 Distribution for Selected Pacific Islands. Engineering Technical Note No. 3, United States  
480 Department of Agriculture:115 pp.

481 *not cited* O'Brien J, Julien P, Fullerton W (1993) Two-dimensional water flood and mudflow  
482 simulation. *J. Hydraul. Eng.-ASCE* 119: 244-261.

483 ✓ Ortiz A. (2017) Modelado de conectividad y contribución de escorrentía superficial lateral  
484 en la dinámica de flujos granulares de áreas volcánicas activas. PhD thesis, Universidad  
485 Autónoma de San Luis Potosí, Facultad de Ciencias, México: 224 pp.

not cited.

486 Ortiz-Rodríguez AJ, Borselli L, Sarocchi D (2017) Flow connectivity in active volcanic  
487 areas: use of index of connectivity in the assessment of lateral flow contribution to main  
488 streams. *Catena* 157: 90 – 111.

489 Roverato M, Capra L, Sulpizio R, Norini G (2011) Stratigraphic reconstruction of two  
490 debris avalanche deposits at Colima Volcano (Mexico): Insights into pre-failure conditions  
491 and climate influence. *Journal of Volcanology and Geothermal Research* 207: 33-46.

492 Scott KM, Vallance JV, Kerle N, Macias JL, Strauch W, Devoli G (2005) Catastrophic  
493 precipitation-triggered lahars at Casita Volcano, Nicaragua: occurrence, bulking and  
494 transformation. *Earth Surface Processes and Landforms* 30: 59-79.

495 Sheridan MF, Connor CB, Connor L, Stinton AJ, Galacia O, Barrios G (2007) October  
496 2005 Debris Flows at Panabaj, Guatemala: Hazard Assessment. *American Geophysical  
497 Union, Spring Meeting 2007, abstract #V33A-07.*

498 Takahashi T (2007) *Debris Flow: Mechanics Prediction, and Countermeasures*. Taylor and  
499 Francis/Balkema, Leiden: 448 pp.

500 Umbal JV, Rodolfo KS (1996) The 1991 lahars of southwestern Mount Pinatubo and  
501 evolution of the lahar-dammed Mapanuepe lake. *Fire and mud; eruptions and lahars of  
502 Mount Pinatubo, Philippines, P. I. o. V. a. Seismology, ed., Quezon, Philippines: pp. 951-  
503 970.*

504 USDA-NRCS (U.S. Department of Agriculture-Natural Resources Conservation Service).  
505 (2007) Hydrologic soil groups. *National engineering handbook. Part 630 hydrology,  
506 Washington, DC.*

507 / van Westen CJ, Daag AS (2005) Analysing the relation between rainfall characteristics and  
508 lahar activity at Mount Pinatubo, Philippines. *Earth and Surface Processes and Landform*  
509 30: 1663-1674.

510 / Van Wyk Vries B, Kerle N, Petley D (2000) Sector collapse forming at Casita volcano,  
511 Nicaragua. *Geology* 28(2): 167-170.

512 / Vázquez R, Suriñach E, Capra L, Arámbula-Mendoza R, Reyes-Dávila G (2016a) Seismic  
513 characterisation of lahars at Volcán de Colima, Mexico. *Bulletin of Volcanology* 78: 8.

514 / Vázquez R, Capra L, Coviello V (2016b) Factors controlling erosion/deposition  
515 phenomena related to lahars at Volcán de Colima, Mexico. *Natural Hazards and Earth*  
516 *System Sciences* 16: 1881–1895.

517 / Zanuttigh B, Lamberti A (2007) Instability and surge development in debris flows. *Rev.*  
518 *Geophys.* 45: RG3006, doi:10.1029/2005RG000175.

519 / Zobin VM, Placencia I, Reyes G, Navarro C (2009) The characteristics of seismic signal  
520 produced by lahars and pyroclastic flows: Volcán de Colima, Mexico. *Journal of*  
521 *Volcanology and Geothermal Research* 179: 157-167.

522



523 **Figure captions**

*where in Mexico is Colima?*

524 Figure 1. a) Aster image (4, 5 and 7 bands in RGB combination) where main watersheds at  
525 Volcán de Colima are represented. The locations of the monitoring stations are indicated.  
526 The inset show the location of the raingauge of the Meteorological National Service at the  
527 summit of the Nevado de Colima Volcano. *Optional...*

528 Figure 2. a) Panoramic view of the Volcán de Colima showing the unvegetated main cone  
529 mostly composed by loose volcanic fragments. *covered (pyroclastic material)*  
530 in the middle reach where it is possible to observe the main channel flanked by 10-15m  
531 high terraces mainly constituted by debris avalanche deposits. *composed of*

532 Figure 3. a) *cumulative* Cumulative and b) *curves for* normalized values of rainfall of hurricanes Jova, Manuel  
533 and Patricia calculated at 10 min-intervals. c) Normalized curve of total rainfalls cumulated  
534 at 15, 30, 60 minutes and 1, 3, 6, 12, 18, 24, 28 hrs. Dotted line represents the average value  
535 between Manuel and Patricia hurricanes. *Not sure what this is showing, other than a smoothed set of lines.*

16

536 Figure 4. a) Seismic record of the lahar triggered during the Hurricane Jova, on 12 October,  
537 2011. b) Seismic record of the lahar triggered during the 11 June, 2013 events. Main pulses  
538 are indicated with roman letters. c) Images captures by the camera corresponding to the  
539 main lahar pulses as indicated in figure b.

540 Figure 5. Images showing the morphology of the channel at the monitoring site of the  
541 Montegrande ravine, a) the day before and b) the day after the Hurricane Jova. c)  
542 *Cross-sectional* Topographic profiles showing that the channel was eroded 1.5 m in depth. *erosion*

543 Figure 6. Seismic record of the lahar triggered during the Hurricane Manuel, on 15  
544 September, 2013, recorded along the Montegrande ravine

545 Figure 7. a) Seismic record of the lahar triggered during the Hurricane Patricia, on 26  
546 October, 2015, recorded along the La Lumbre ravine. Main lahar pulses are indicated with  
547 roman letters. b) Images captured by the camera corresponding to the main pulses as  
548 indicated in figure a.

549 Figure 8. Diagrams showing the main lahar pulses (red triangles) as detected from the  
550 seismic signal of the analyzed events in relation with the accumulated rainfall (dark line),  
551 rainfall intensity (10m/hr) (gray line) and simulated watershed discharge (blue line) for the  
552 following hidrometeorological events a) Jova; b) Manuel; c) 13 June, 2013; and d) Patricia.

553 Table 1. Data collected for the events here studied.  
554

555 Table 2. Normalized accumulated rains (in percentage) at progressive time steps.

556

Table 1. Data collected for the events here studied.

| Event        | ravine      | Seismic record | Image record | Total rain (mm) | Max. rain intensity (mm/hr) |
|--------------|-------------|----------------|--------------|-----------------|-----------------------------|
| Jova         | Montegrande |                |              | 240             | 43                          |
| Manuel       | Montegrande | X              |              | 300             | 32                          |
| Patricia     | Lumbre      | X              | X            | 400             | 37                          |
| 11 June 2013 | Montegrande | X              | X            | 120             | 140                         |

*Add dates...*

28 in text

Table 2. Normalized accumulated rains (in percentage) at progressive time steps.

| Event/time (hrs) | 0.25           | 0.5            | 1              | 2             | 3              | 6              | 12            | 24           | 27            |
|------------------|----------------|----------------|----------------|---------------|----------------|----------------|---------------|--------------|---------------|
| <b>Jova</b>      | 0.0011         | 0.0016         | 0.0035         | 0.0172        | 0.0329         | 0.1411         | 0.7073        | 0.968        | 0.9943        |
| <b>Manuel</b>    | 0.0023         | 0.0035         | 0.0042         | 0.0072        | 0.0151         | 0.0341         | 0.1548        | 0.735        | 0.9181        |
| <b>Patricia</b>  | 0.0002         | 0.0004         | 0.0009         | 0.0062        | 0.0174         | 0.0556         | 0.2544        | 0.829        | 0.9782        |
| <b>average</b>   | <b>0.00125</b> | <b>0.00195</b> | <b>0.00255</b> | <b>0.0067</b> | <b>0.01625</b> | <b>0.04485</b> | <b>0.2046</b> | <b>0.782</b> | <b>0.9481</b> |

The average values refer to hurricanes Manuel and Patricia.

altitude in m ASL, ?

OK, so  
rain gauge  
at 10km away  
& on another  
mountain.....

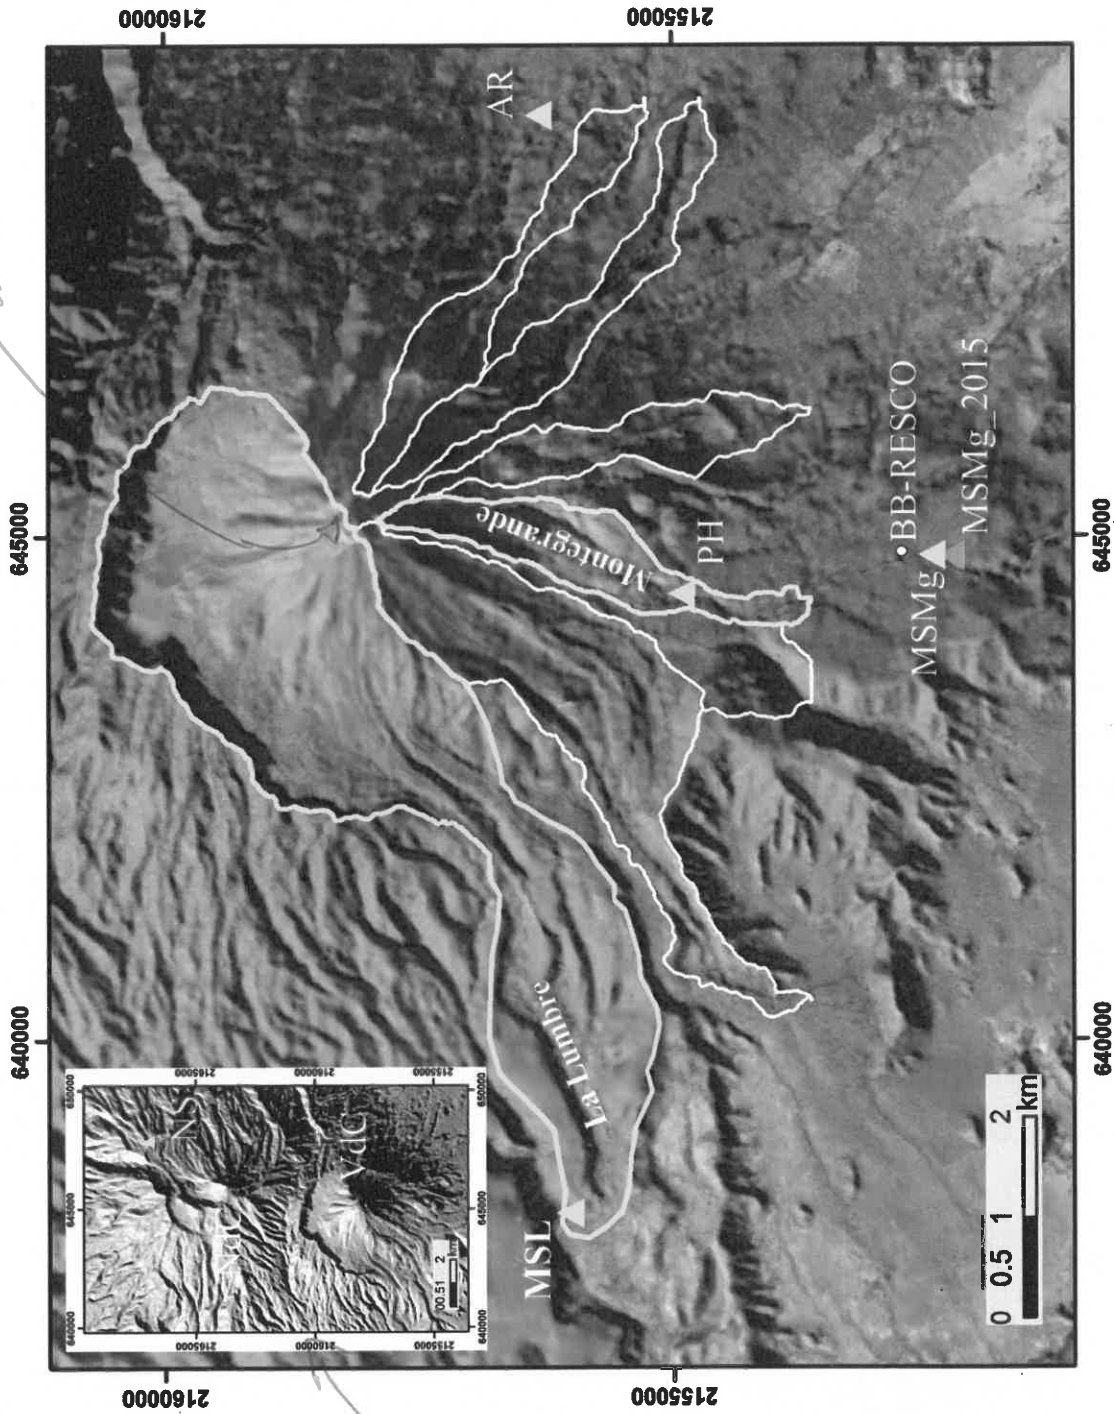

replace met  
with location of  
VAC in  
Mexico

Figure 01

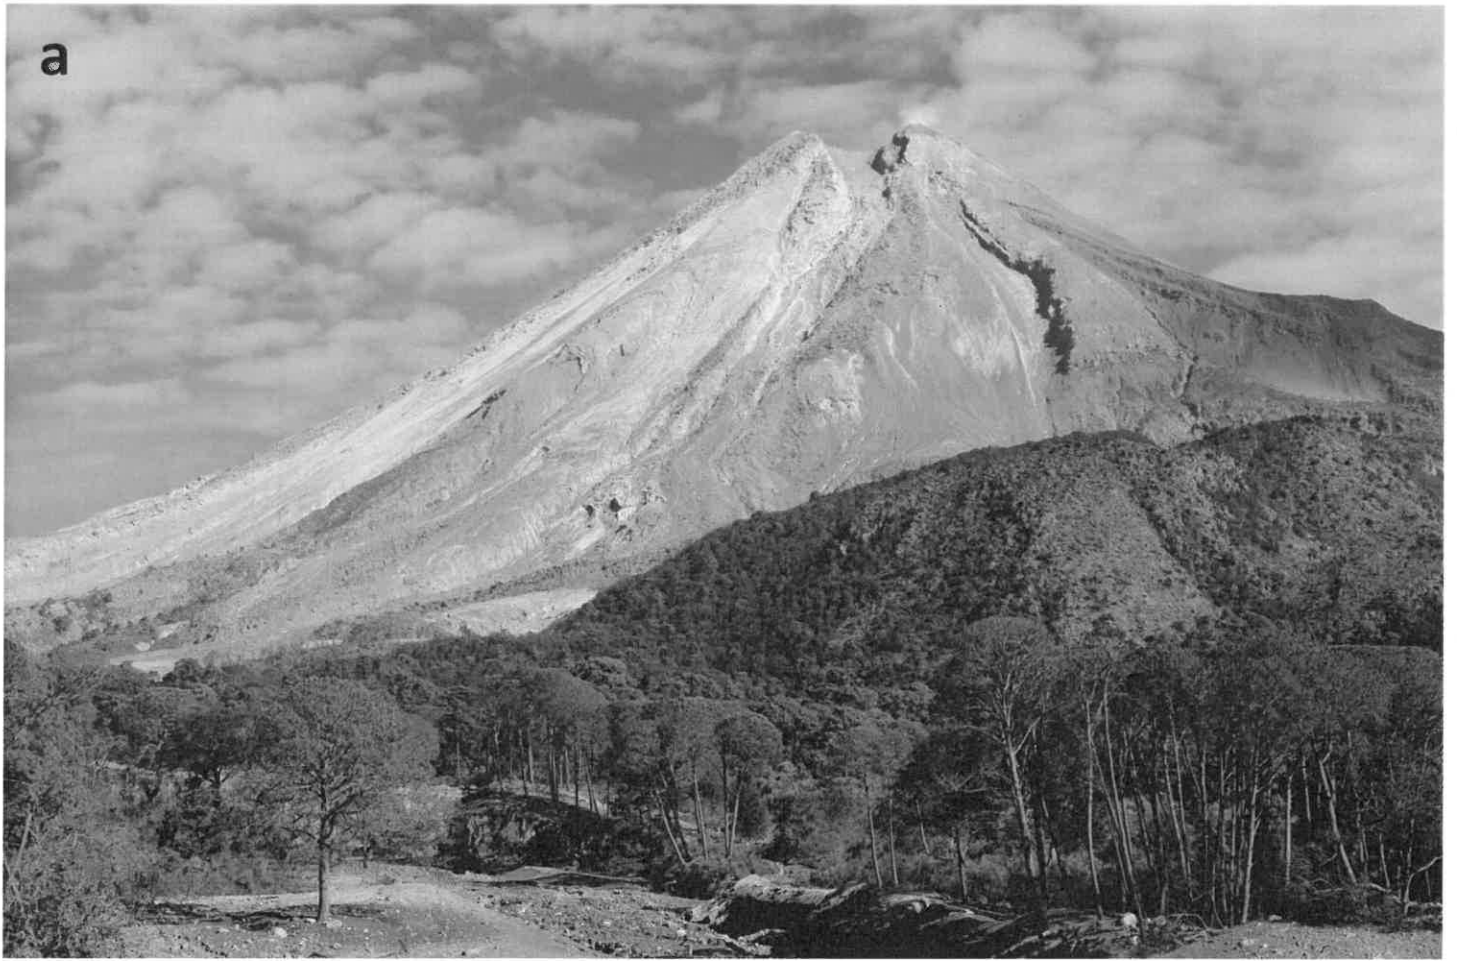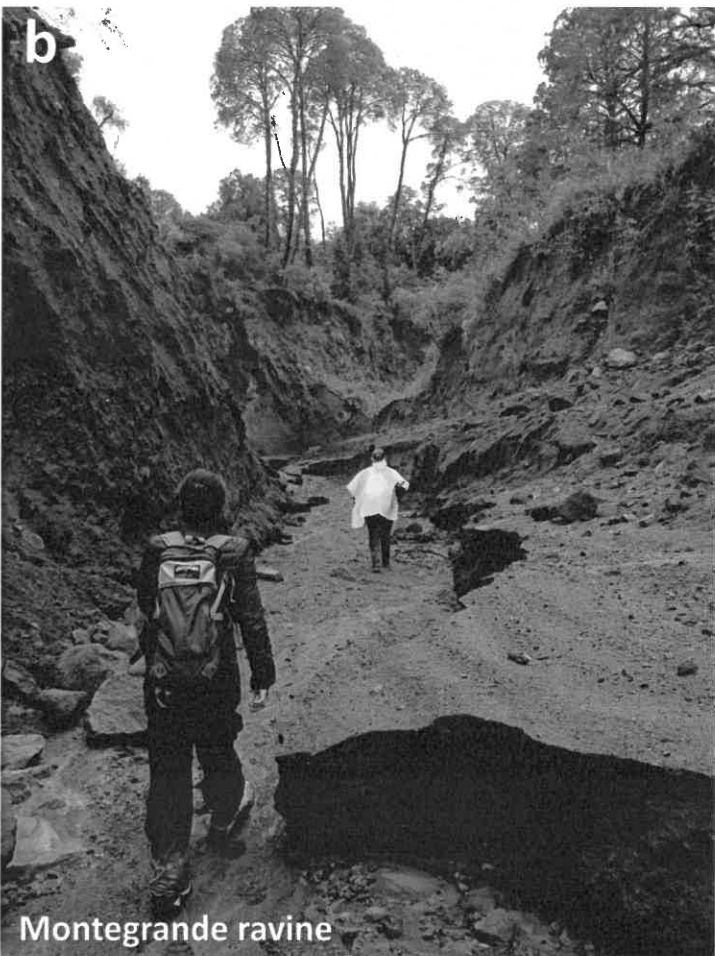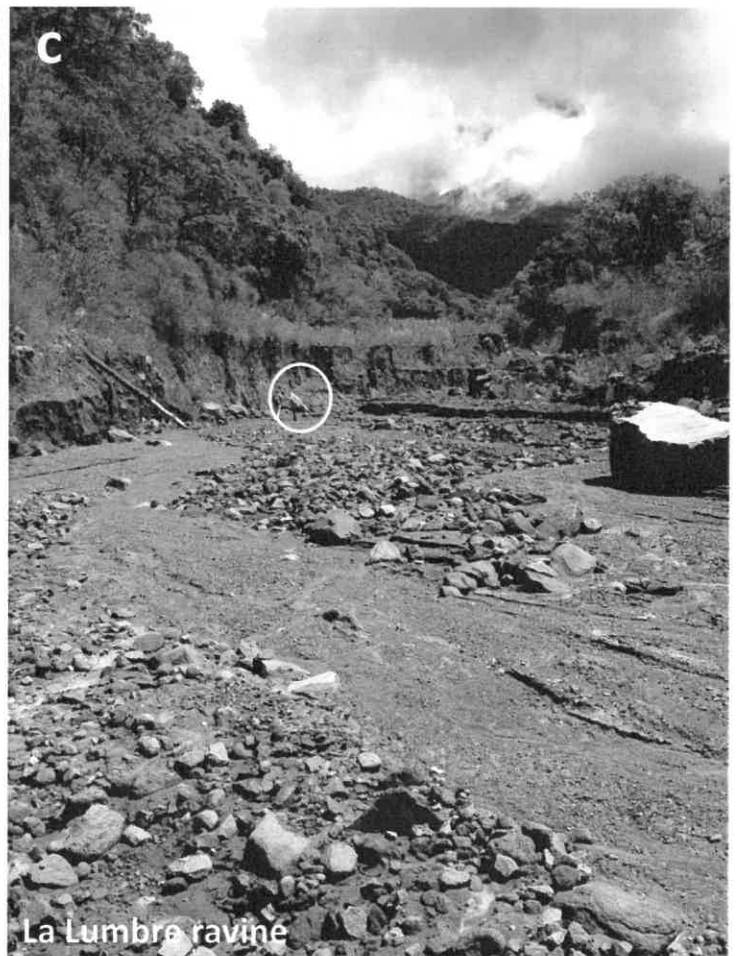

Figure 02

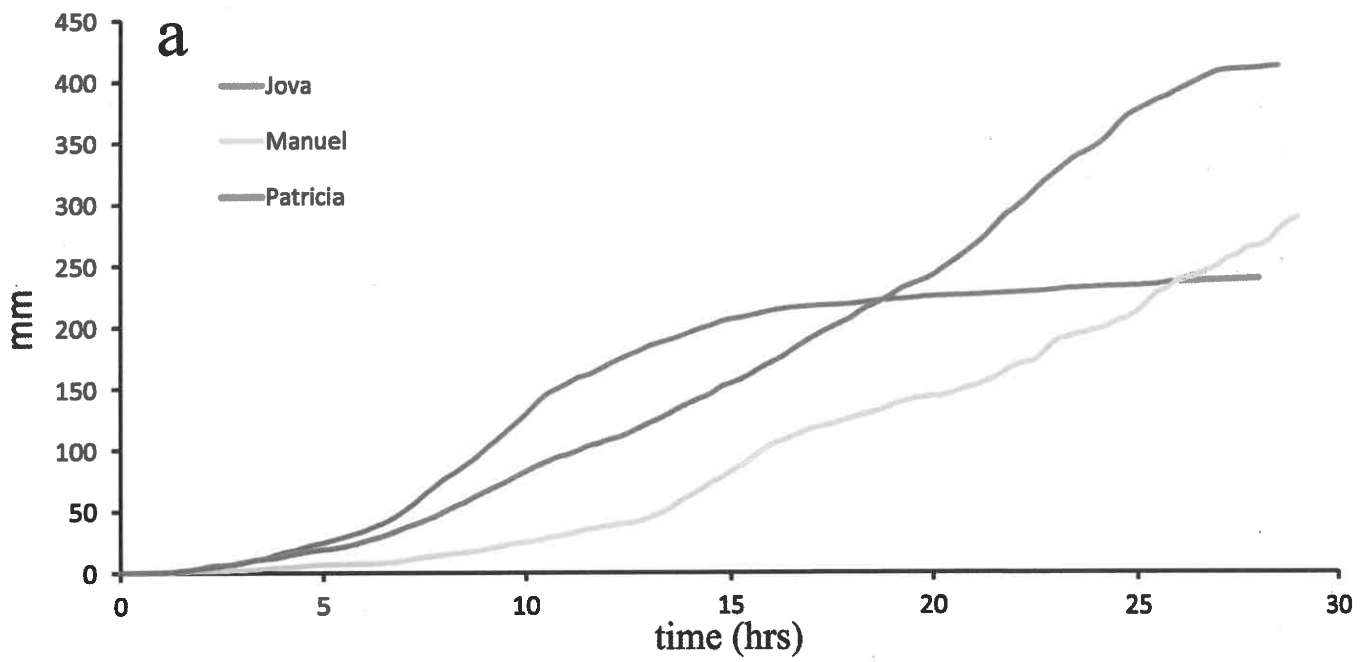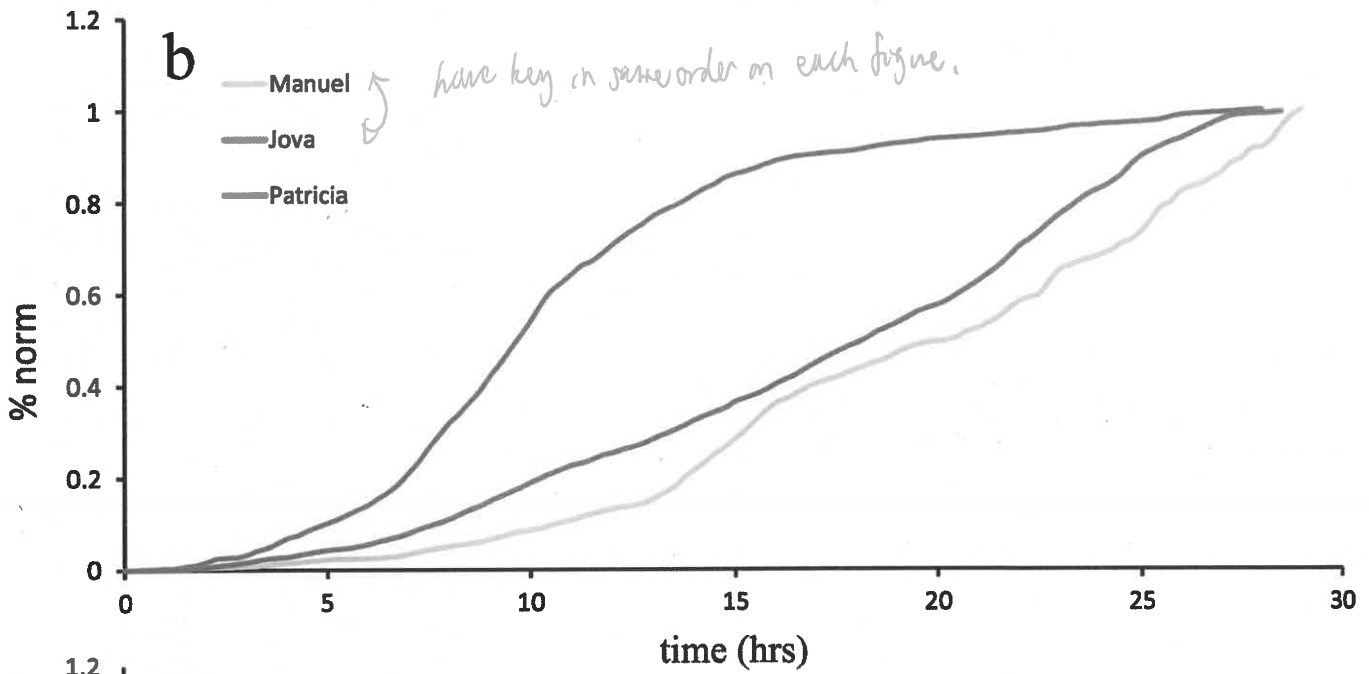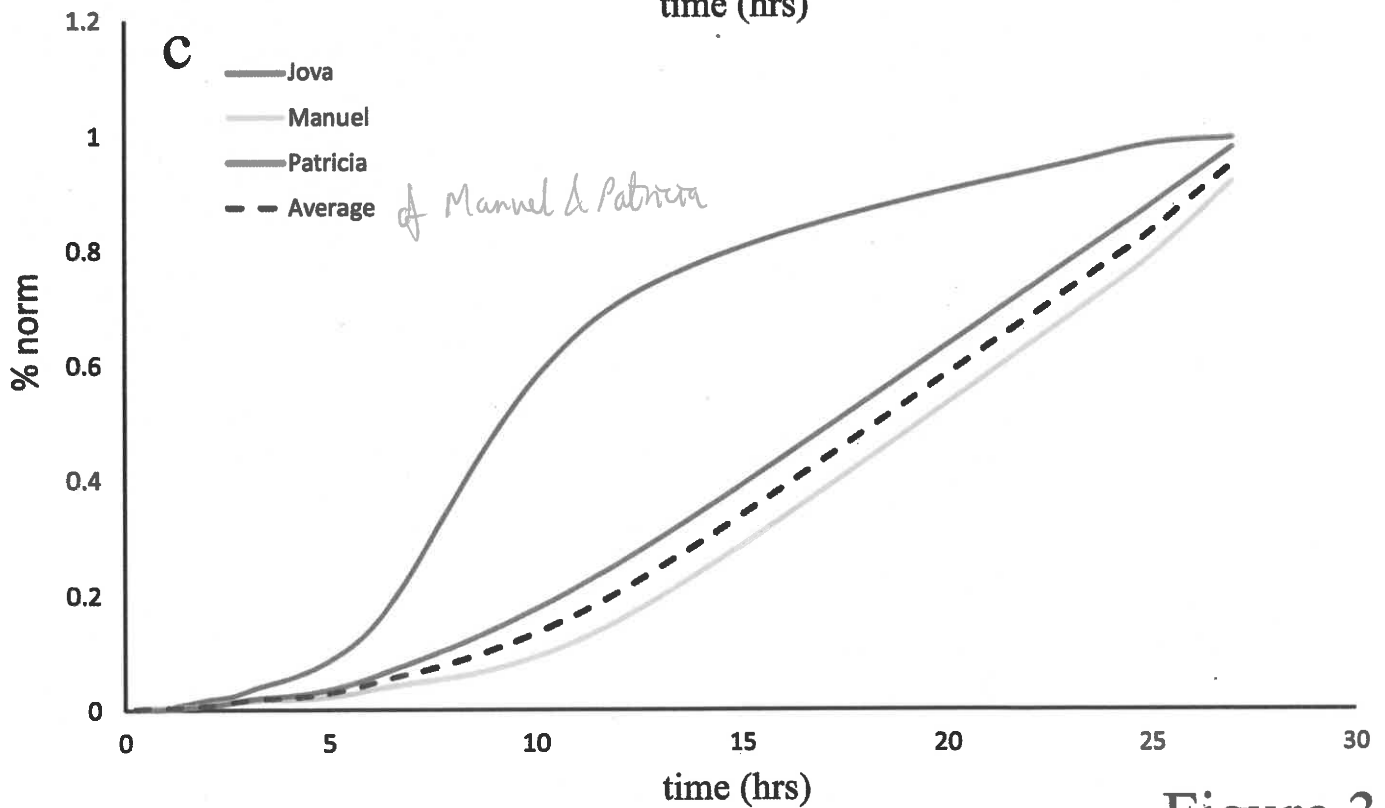

Figure 3

(17)

This is an RSAM plot, so it's integrating seismic energy across a range of frequencies & summing it in a time bin.

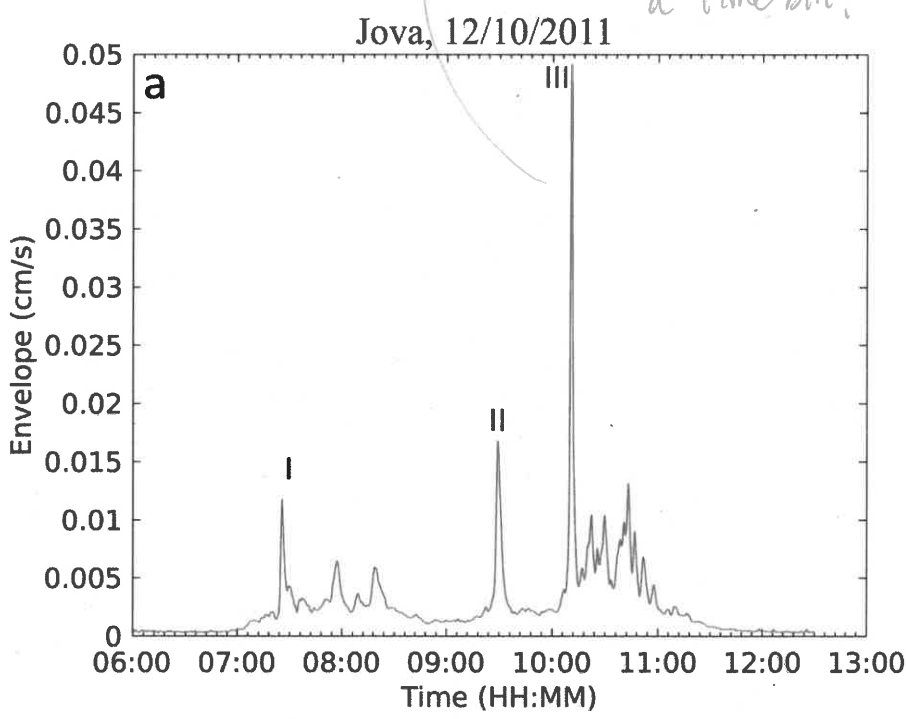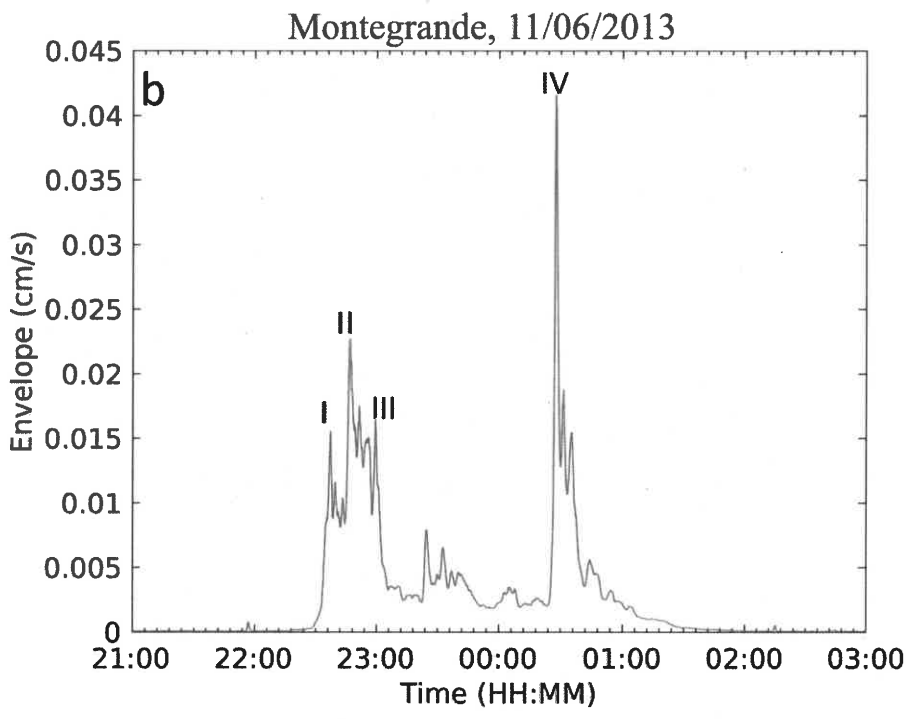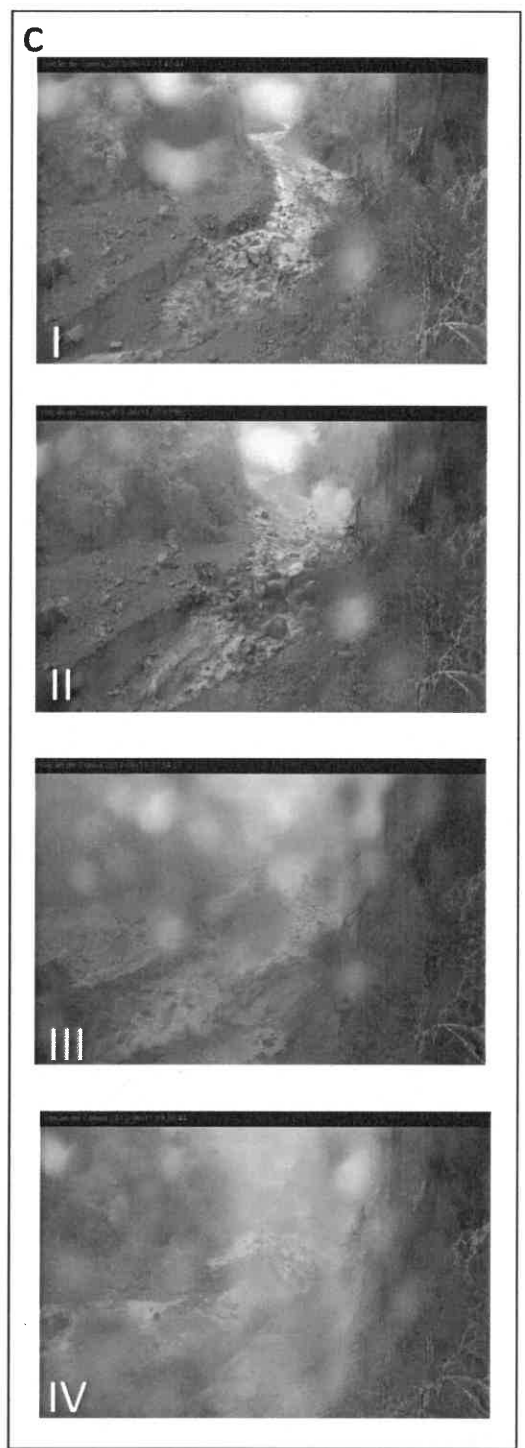

Figure 4



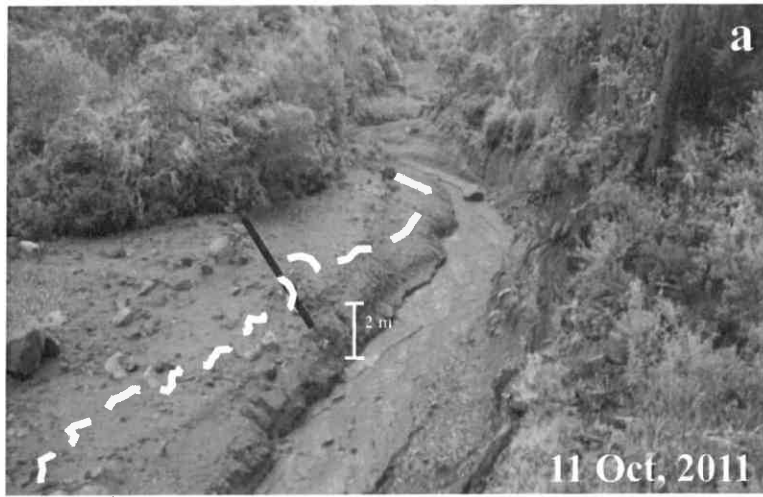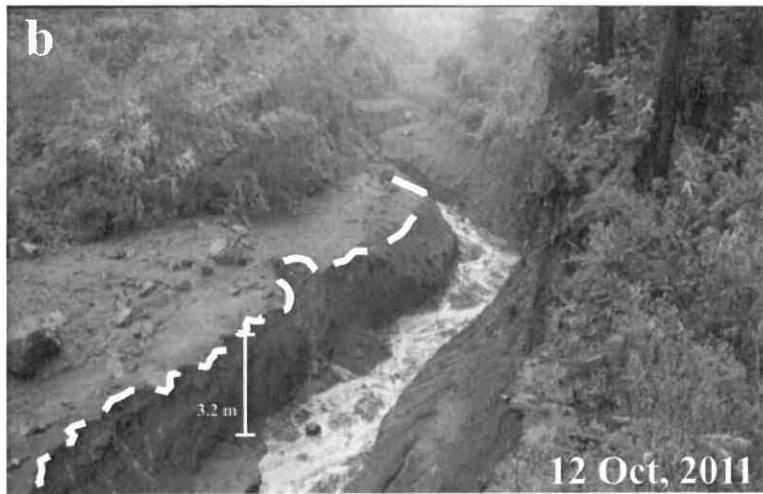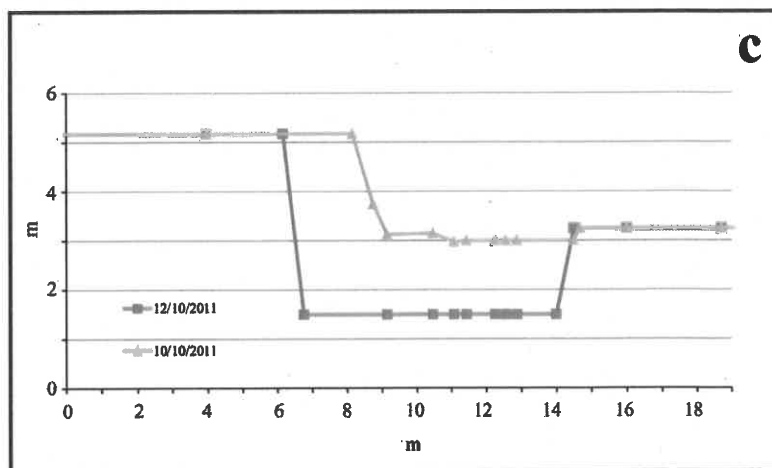

Figure 5

Manuel, 16/09/2013

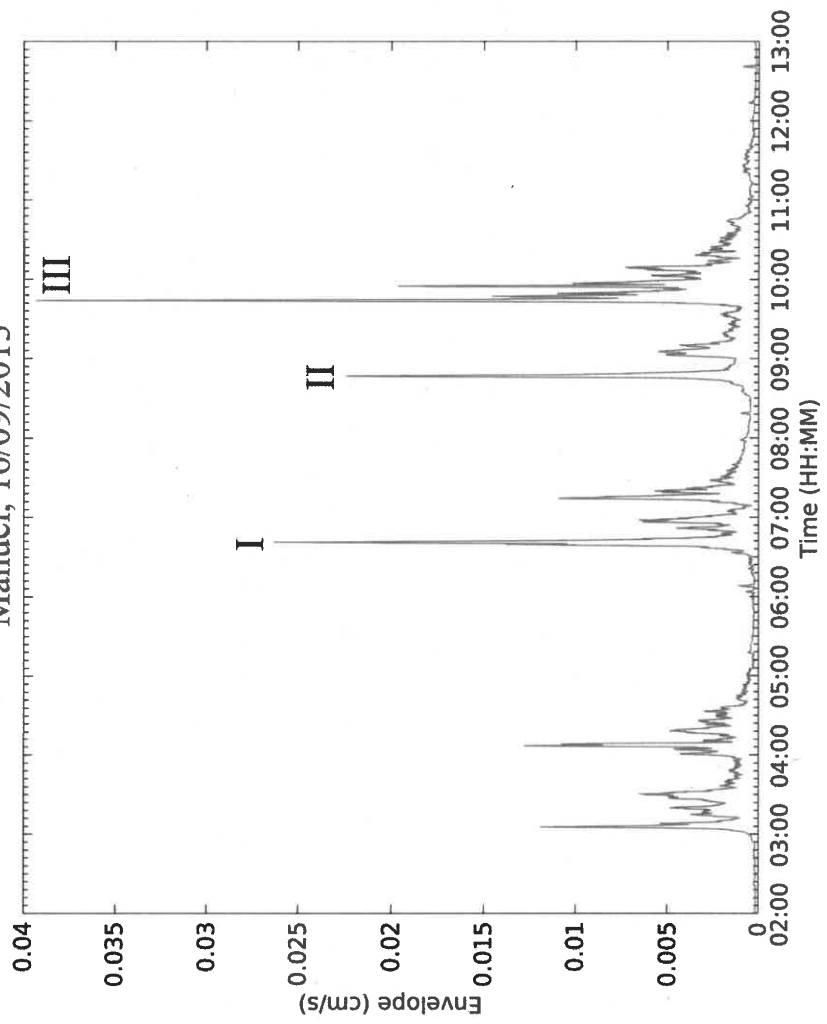

✓

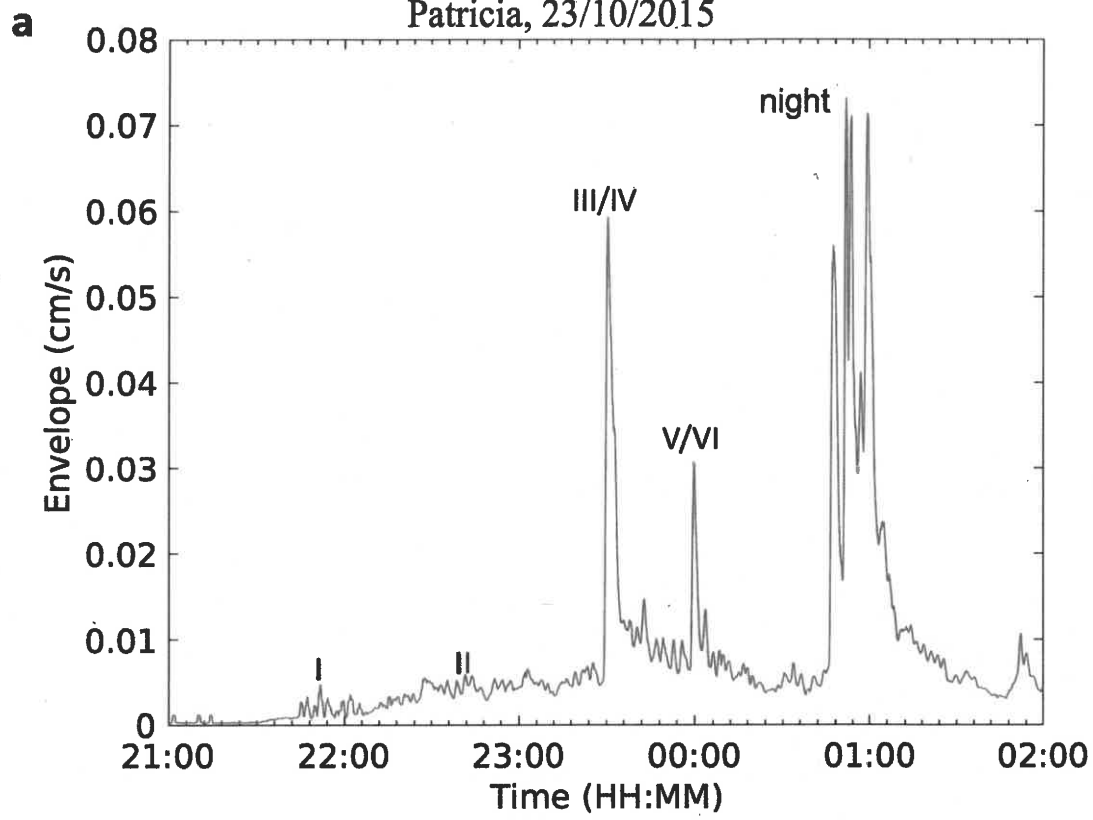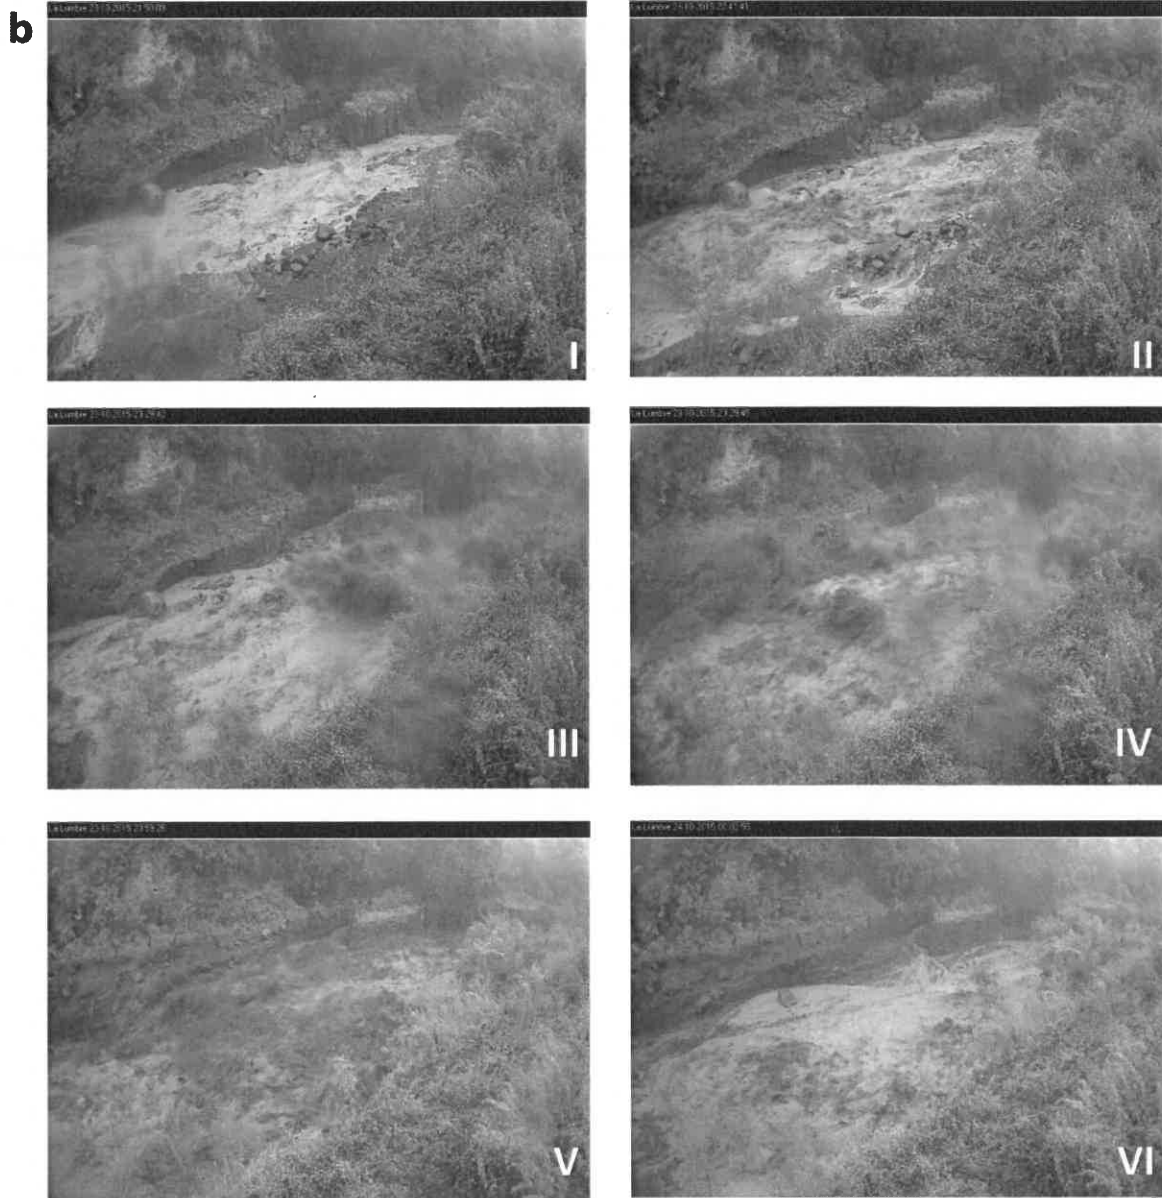

Figure 7

**Montegrande, Hurricane Jova 2011**

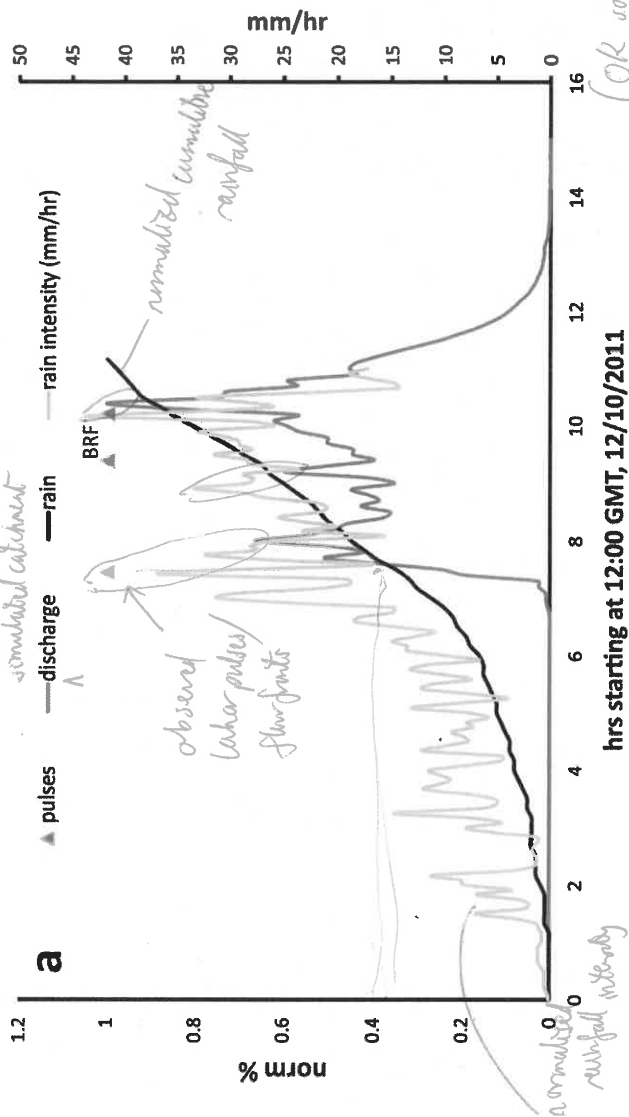

**Montegrande, Hurricane Manuel 2013**

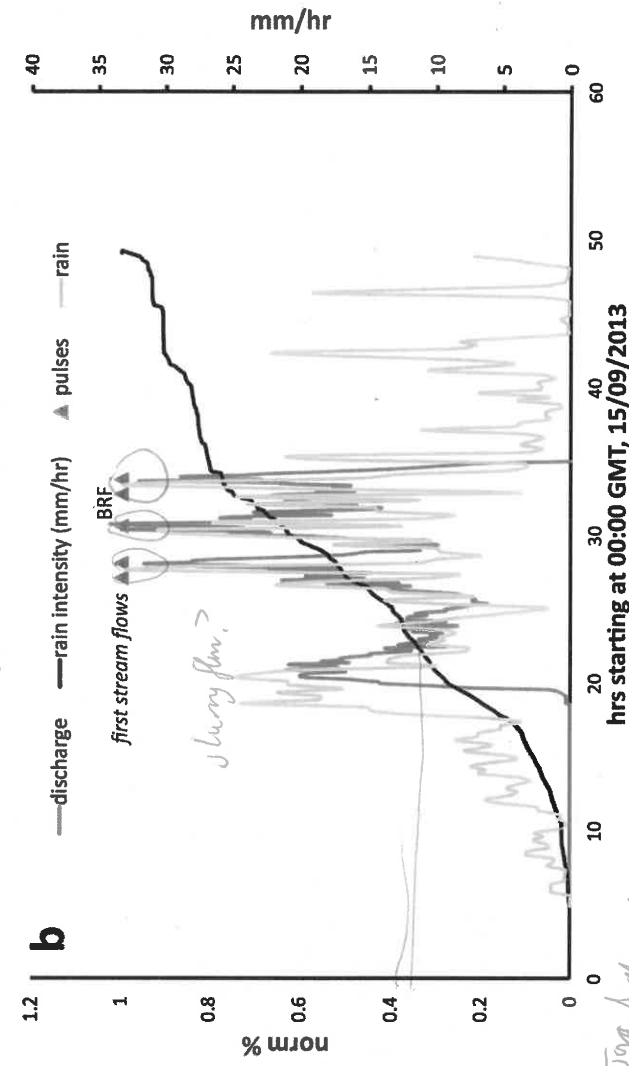

**Montegrande, 11 Junio 2013**

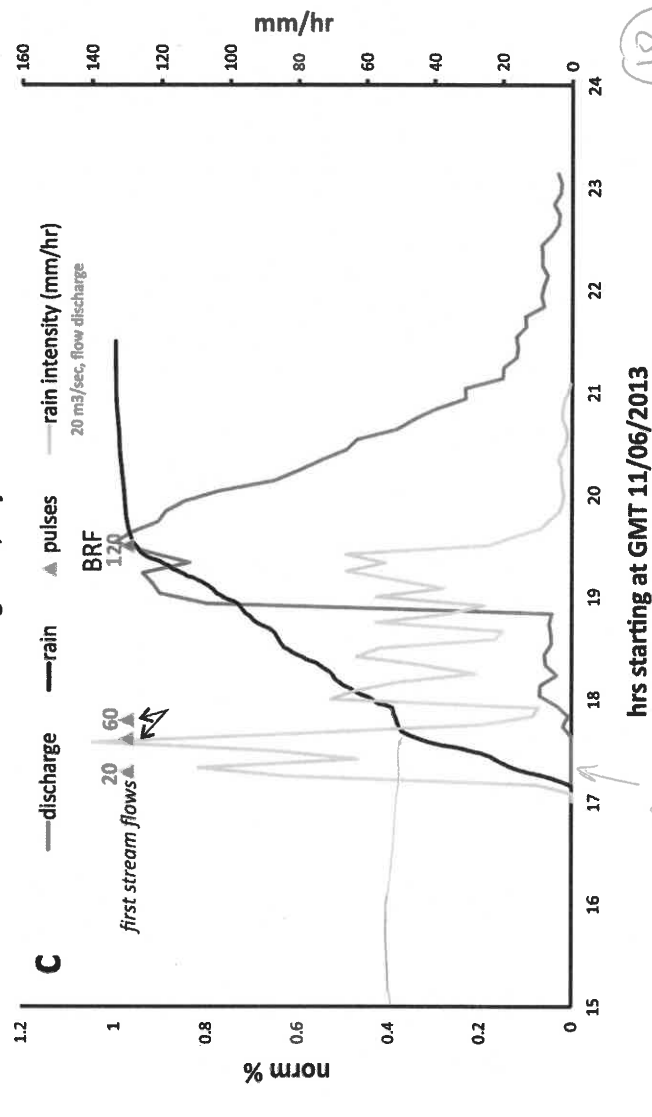

**Lumbre, Hurricane Patricia 2015**

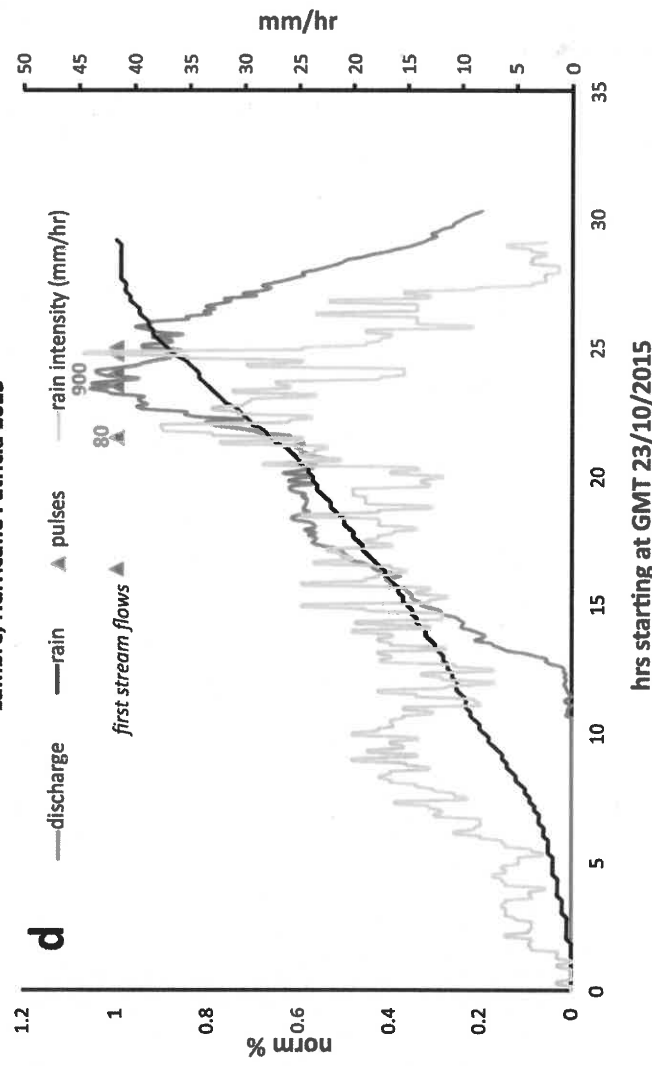

18

Ignore my scribbles on this figure.

Figure 08
